# Supplementary material for: IOA-244 is a Non–ATP-competitive, Highly Selective, Tolerable PI3K Delta Inhibitor That Targets Solid Tumors and Breaks Immune Tolerance
Source: PubMed Central journal article supplement (PMC10103717; doi:10.1158/2767-9764.crc-22-0477), 2023-04-14
Supplement: crc-22-0477-s01.pdf [file crc-22-0477-s01.pdf]

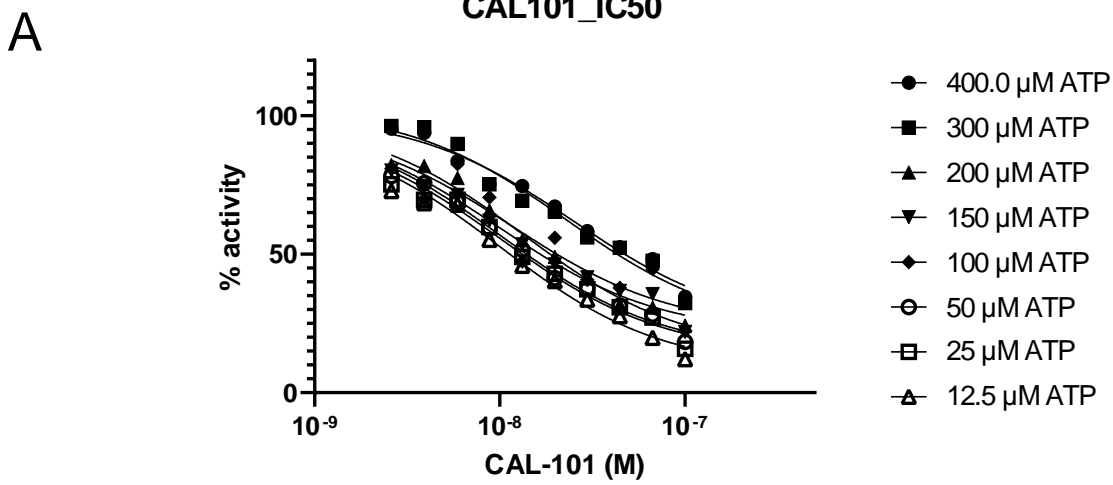

|      | 400.0 μM ATP | 300 μM ATP | 200 μM ATP | 150 μM ATP | 100 μM ATP | 50 μM ATP  | 25 μM ATP  | 12.5 μM ATP |
|------|--------------|------------|------------|------------|------------|------------|------------|-------------|
| IC50 | 2.515e-008   | 2.285e-008 | 1.343e-008 | 9.878e-009 | 1.163e-008 | 1.019e-008 | 1.031e-008 | 1.011e-008  |

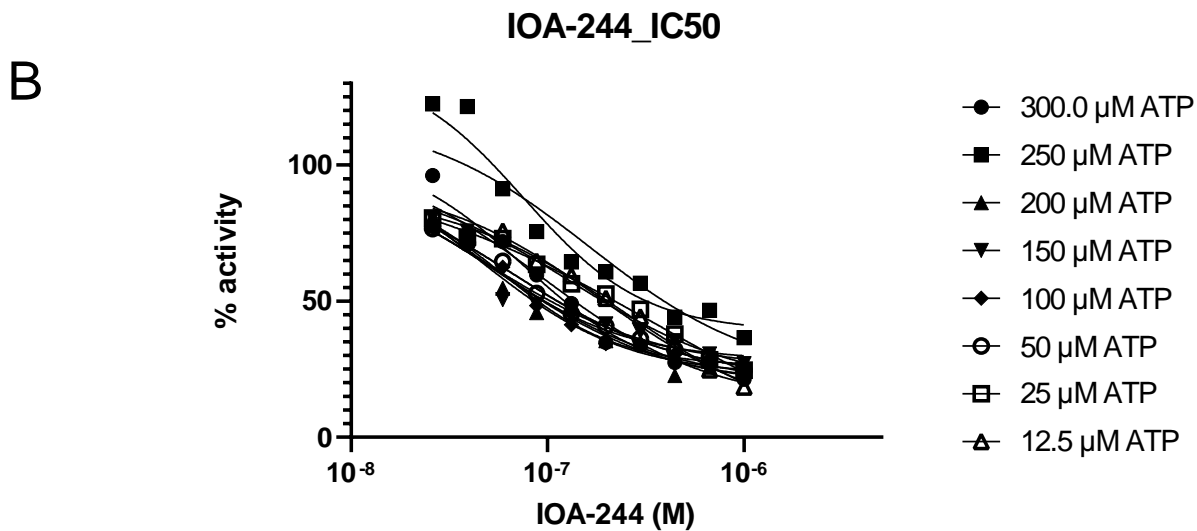

|      | 300.0 μM ATP | 250 μM ATP | 200 μM ATP | 150 μM ATP | 100 μM ATP | 50 μM ATP  | 25 μM ATP  | 12.5 μM ATP |
|------|--------------|------------|------------|------------|------------|------------|------------|-------------|
| IC50 | 9.449e-008   | 1.635e-007 | 5.782e-008 | 4.956e-008 | 5.649e-008 | 6.420e-008 | 1.310e-007 | 1.885e-007  |

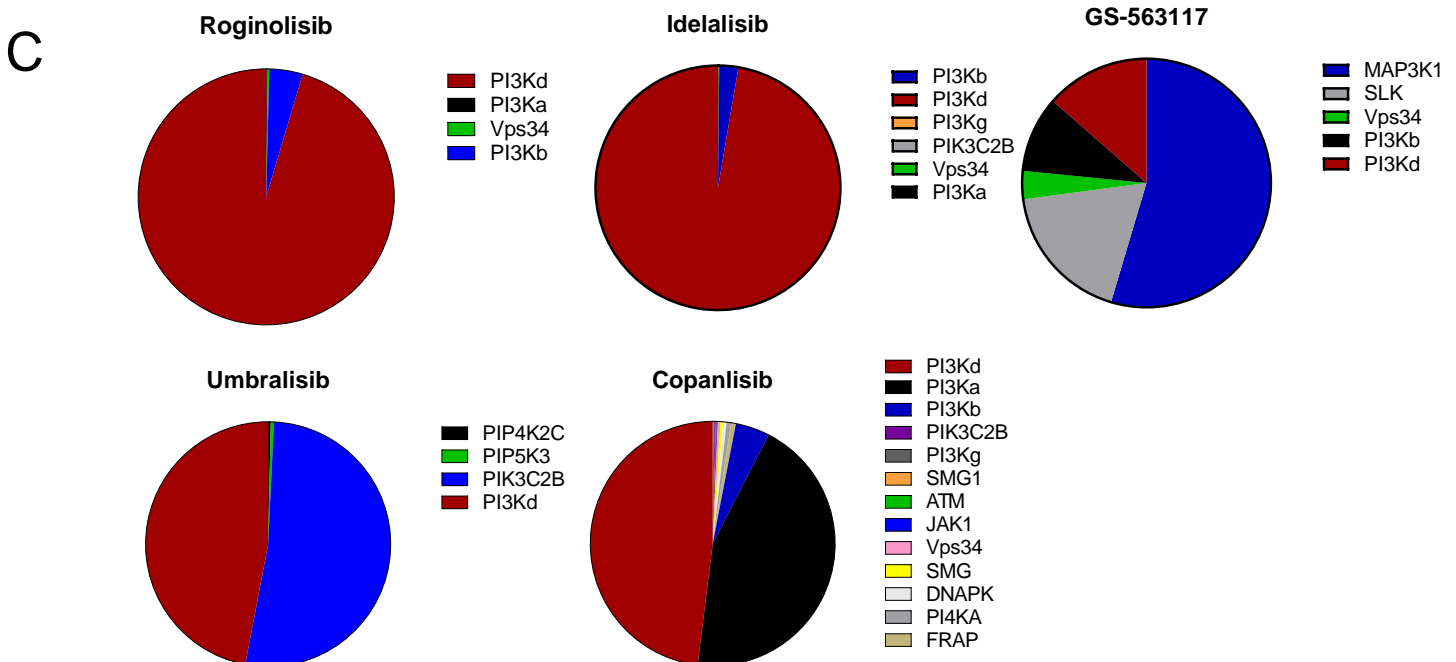

Supplementary figure 1: (A-B) IC50 of Idelalisib (A) and IOA-244 (B) derived from the ATP competition assay shown in Figure 1C and 1D respectively. (C) Representation of the selectivity of the represented PI3Kδ inhibitors and Idelalisib main metabolite GS-563117 using partition index based on IC50 values in Jurkat cell lysate as measured by KiNativ assay.
