# Supplementary material for: IOA-244 is a Non–ATP-competitive, Highly Selective, Tolerable PI3K Delta Inhibitor That Targets Solid Tumors and Breaks Immune Tolerance
Source: PubMed Central journal article supplement (PMC10103717; doi:10.1158/2767-9764.crc-22-0477), 2023-04-14
Supplement: crc-22-0477-s03.pdf [file crc-22-0477-s03.pdf]

**A****B- and T-cell lymphoma**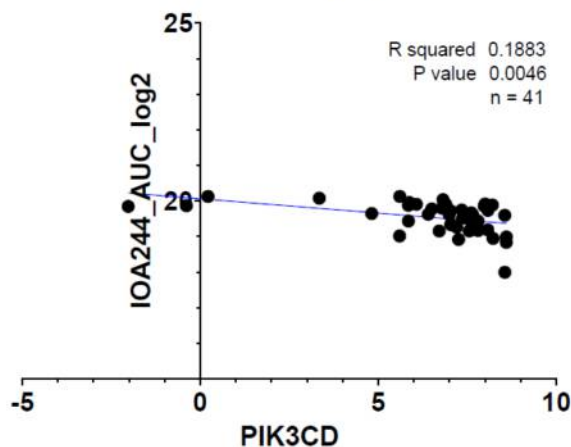**B****B- and T-cell lymphoma**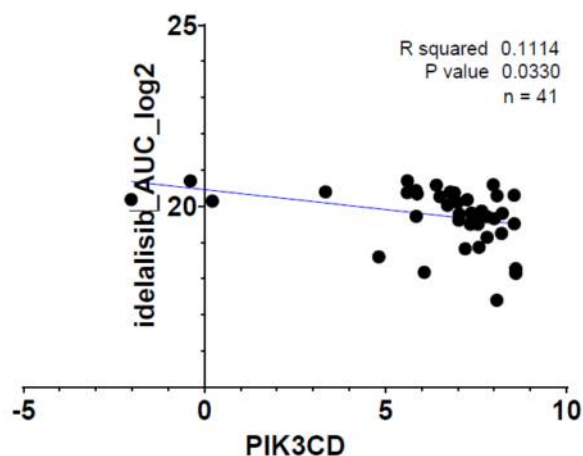**C****B-cell lymphoma**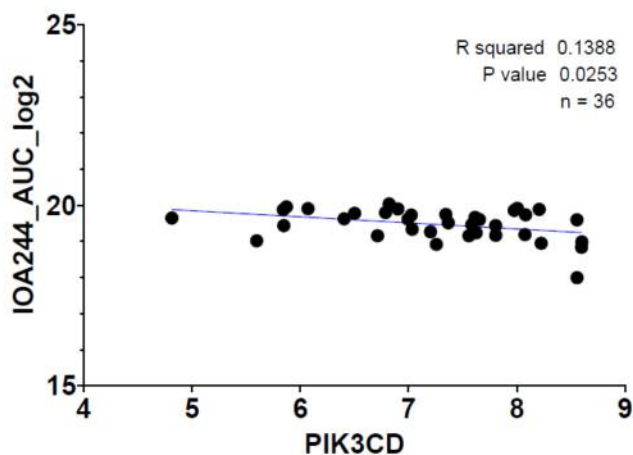**D****B-cell lymphoma**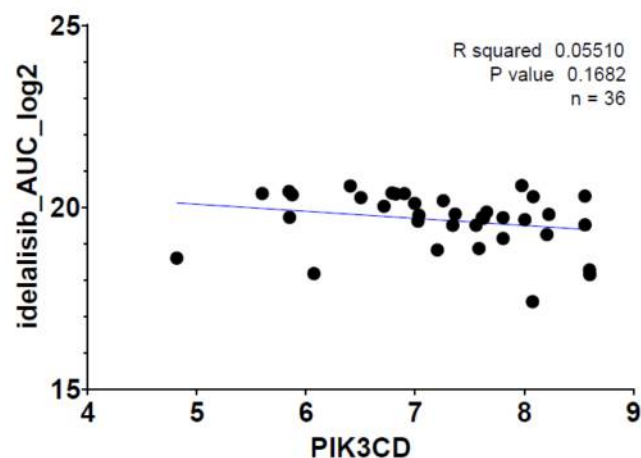

Supplementary figure 3: (A-D) Correlation between AUC values and PIK3CD transcript expression in 41 B and T cell lymphoma cell lines exposed to IOA-244 (A) or to idelalisib (B) and in 36 B cell lymphoma cell lines exposed to IOA-244 (C) or to idelalisib (D). AUC was calculated after treatment with the drugs at increasing concentrations for 72 hours; PIK3CD RNA expression was extrapolated by RNA sequencing of each cell line at baseline conditions.  $R^2$ , Spearman correlation.
